# Supplementary material for: A Novel Nutrient- and Antioxidant-Based Formulation Can Sustain Tomato Production under Full Watering and Drought Stress in Saline Soil
Source: MDPI journal article supplement (doi:10.3390/plants12193407), 2023-09-27
Supplement: s1 [file s1]

**Table S1.** Primers sequences for RT-PCR of the stress-related genes in tomato.

| The gene       | Reference Seq.    | 5' - 3' primer sequence                                 | T <sub>A</sub> |
|----------------|-------------------|---------------------------------------------------------|----------------|
| <i>Actin 1</i> | <i>AB181991</i>   | F: CTCTGACAATTTCCCGCTCA<br>R: ACACGCTTCCTCATGCTATCC     | 58 °C          |
| <i>Actin 2</i> | <i>AT2G37620</i>  | F: GCTATTCAAGCCGTGCTTTC<br>R: AGCATGTGGAAGGGCATAAC      |                |
| <i>SOD</i>     | <i>MG893090.1</i> | F: TTCGCCATGCTGGTGATCTT<br>R: CATGGACAACCTACGGCCCTT     |                |
| <i>CAT</i>     | <i>GU984379</i>   | F: GGCTGCTTGAAGTTGTTCTCCT<br>R: CTGCTAGTACCTCCTGATCCGTT |                |
| <i>APX</i>     | <i>KU747079.1</i> | F: TGGCCTGCTCTTCCTCTAGT<br>R: CATGCCACGCTAATCGAAGC      |                |
| <i>GR</i>      | <i>KX828561.1</i> | F: CAACGCGCTTTGGTAACTCC<br>R: GGGCCCTAATGAAGTGGAGG      |                |
